# Supplementary material for: Antisense Transcription in Plants: A Systematic Review and an Update on cis-NATs of Sugarcane
Source: MDPI journal article supplement (doi:10.3390/ijms231911603), 2022-10-01
Supplement: s1 [file s1]

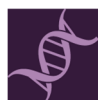

# Antisense Transcription in Plants: A Systematic Review and an Update on cis-NATs of Sugarcane

Luciane Santini<sup>1</sup>, Leonardo Yoshida<sup>1</sup>, Kaique Dias de Oliveira<sup>1</sup>, Carolina Gimiliani Lembke<sup>1</sup>, Augusto Lima Diniz<sup>1</sup>, Geraldo Cesar Cantelli<sup>1</sup>, Milton Yutaka Nishiyama-Junior<sup>2</sup>, Glaucia Mendes Souza<sup>1,\*</sup>

<sup>1</sup> Departamento de Bioquímica, Instituto de Química, Universidade de São Paulo, São Paulo, 05508-900, Brazil

<sup>2</sup> Laboratório de Toxinologia Aplicada, Instituto Butantan, São Paulo, 05503-900, Brazil

\* Correspondence: glmsouza@iq.usp.br

Supplementary Figure S1

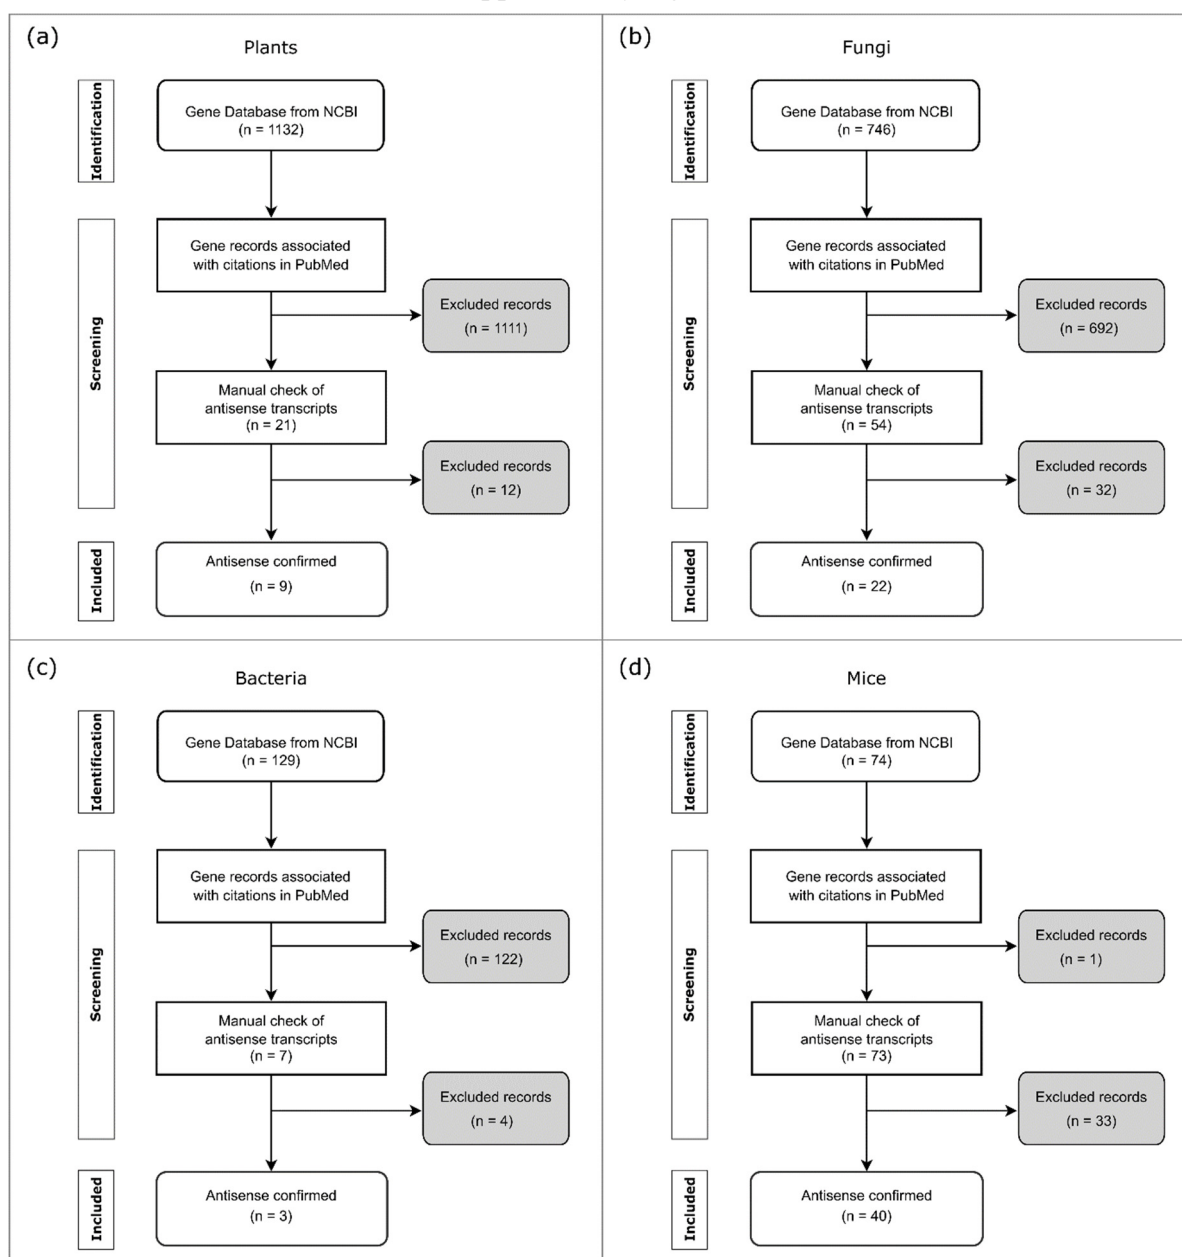

**Figure S1.** Workflow and results of the systematic search for gene sequences related to antisense expression in plants (a), fungi (b), bacteria (c), and mice (d). White: screening process; gray: excluded records. The search was conducted on the “Gene” database from NCBI (<https://www.ncbi.nlm.nih.gov/>) on 18 February, 2022.
